# Supplementary material for: A facile strategy based on the metal-free design of carbon to deliver an insight into the active sites for liquid phase carbocatalysis
Source: Royal Society of Chemistry journal article supplement (doi:10.1039/c9cc09918b), 2020-01-01
Supplement: c9cc09918b1.pdf [file c9cc09918b1.pdf]

## Supporting Information

### **A facile strategy based on metal-free design of carbon to deliver an insight into the active sites for liquid phase carbocatalysis**

Shuchang Wu,<sup>\*a,b</sup> Xiaoli Pan,<sup>c</sup> Shutao Xu,<sup>c</sup> Hua Yan,<sup>a</sup> Yangming Lin,<sup>b</sup> Guodong Wen,<sup>b</sup>  
Jiangyong Diao,<sup>b</sup> Hongyang Liu<sup>\*b</sup>

## **Experimental section**

### *Materials*

Microcrystalline cellulose and nitrobenzene (99%) were purchased from Alfa Aesar. Hydrazine monohydrate (85%), nitric acid (GR), methanol (AR) and ethanol (AR) were supplied by China Medicine Group Shanghai Chemical Reagent Company. Styrene (99%), benzyl alcohol (99%) and sodium borohydride (98%) were bought from Aladdin Reagent Co. Ltd., Shanghai, China.

### *Catalyst preparation*

All the chemicals that with analytical purity are commercially available. To synthesize biomass based carbon, cellulose was placed in a ceramic crucible with a cover. Then the precursor was heated to 600 °C with the heating rate of 5 °C/min in the N<sub>2</sub> flow, and maintained for 2 h. The obtained black powder was denoted as C<sub>bio</sub>. To get the surface modified product, the C<sub>bio</sub> was oxidized with concentrated nitric acid at 120 °C for 2 h. After oxidation, the obtained powder was rinsed with de-ionized water until the filtrate became neutral, followed by drying at 100 °C. The functionalized sample was labeled as OC<sub>bio</sub>.

### *Catalyst Characterization*

The morphology of samples was studied by scanning electron microscope (SEM) and transmission electron microscope (TEM, Tecnai G2 F20). Powder X-ray diffraction (XRD) characterization was performed on a STOE STADI P transmission diffractometer equipped with a primary focusing Germanium monochromator (Cu K $\alpha$ 1 radiation) and Dectris MYTHEN 1K position sensitive microstrip solid-state detector. Fourier transform infrared (FT-IR) spectrum was carried out on a Thermo Scientific® Nicolet spectrophotometer. Raman spectroscopy was performed by a LabRam HR 800 using 633 nm laser. The specific surface area was calculated by Brunauer-Emmett-Teller (BET) method, and the nitrogen adsorption-desorption isotherms were acquired from Micromeritics ASAP 2020 plus/2060. The X-ray photoelectron spectroscopy (XPS) measurements were carried out in an ultrahigh vacuum (UHV) ESCALAB 250 set-up equipped with a monochromatic Al K $\alpha$  X-ray source (1486.6eV; anode operating

at 15kV and 20mA). Solid state nuclear magnetic resonance (NMR) experiments were performed on a Bruker AvanceIII 600 spectrometer equipped with a 14.1 T wide-bore magnet using a 4 mm magic angle spinning (MAS) probe with a spinning rate of 12 kHz.  $^{13}\text{C}$  CP-MAS NMR spectra were recorded using a cross polarization sequence.

#### *Catalytic performance evaluation*

In a typical catalytic performance evaluation, the reduction of nitrobenzene was performed in a bath mode. Unless otherwise noted, a certain amount of the catalyst, 10 mmol of nitrobenzene, 5 equivalent of hydrazine hydrate (85%), 2 mL of ethanol were added to the 50 mL bottom rounded flask with the cooling system, followed by the reaction at 100 °C for a certain period of time. After the reaction, the products were analyzed by high performance liquid chromatography (HPLC) equipped with SinoChrom ODS-BP column and ultraviolet (UV) detector. For the recycling test, the used catalyst was collected, washed with ethanol, and then dried at 60 °C before the next run. The reaction condition was the same as mentioned above except that the catalyst was the recovered sample rather than the fresh one.

For C=C bond reduction, 20 mg of catalyst, 2 mmol of styrene, 5 equivalent of hydrazine hydrate and 2 mL of ethanol were charged to a bottom rounded flask under oxygen atmosphere, and then reacted at 70 °C. The conversion of styrene was determined by gas chromatography (GC).

The methanolysis of  $\text{NaBH}_4$  to produce hydrogen was performed at room temperature in a 50mL of bottom rounded flask charged with 30 mg of catalyst, 60 mg of  $\text{NaBH}_4$  and 10 mL of methanol.

The selective oxidation of benzyl alcohol was carried out in a 15 mL of sealed glass reactor that charged with 50 mg of benzyl alcohol and 50 mg of catalyst. The reactor was placed in a 100 °C oven for 24 h, and the product was analyzed by GC.

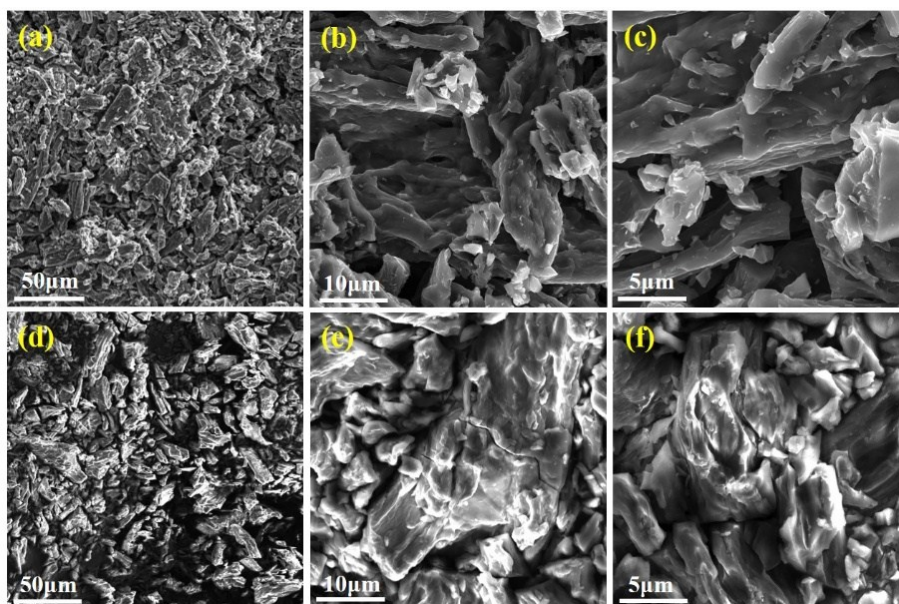

Figure S1. SEM images of  $C_{bio}$  (a-c) and  $OC_{bio}$  (d-f)

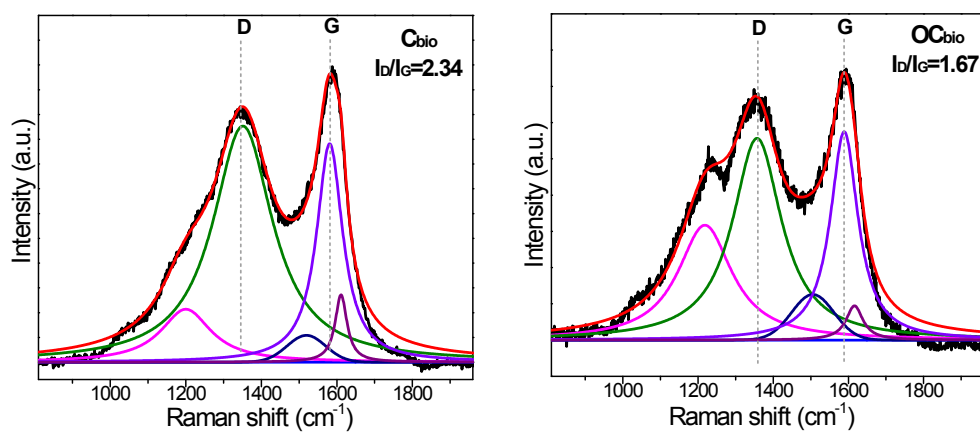

Figure S2. Raman spectra of  $C_{bio}$  and  $OC_{bio}$

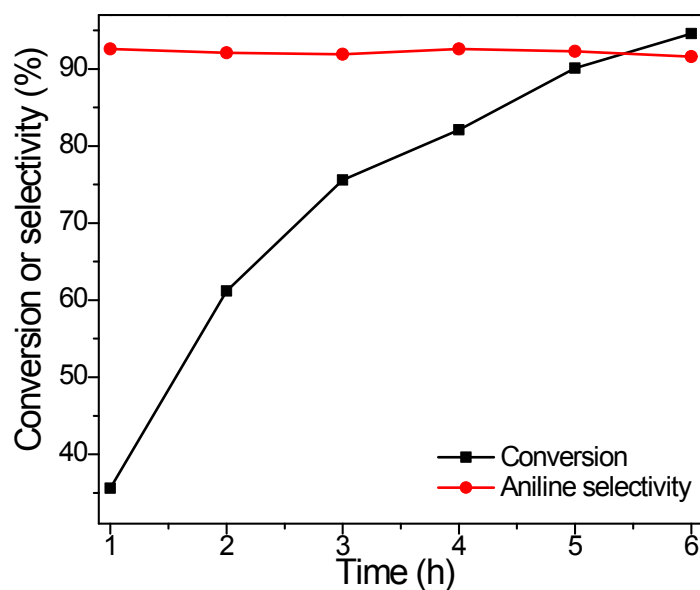

Figure S3. Nitrobenzene reduction in the presence of OC<sub>bio</sub>

Table S1. Surface oxygen content for C<sub>bio</sub> and OC<sub>bio</sub>

| Sample            | Content (at %) |      |       |         |
|-------------------|----------------|------|-------|---------|
|                   | O              | C=O  | O=C-O | C-O (H) |
| C <sub>bio</sub>  | 4.9            | 1.4  | 2.8   | 0.7     |
| OC <sub>bio</sub> | 22.4           | 10.5 | 10.5  | 1.4     |

Table S2. The contents of metal impurities in each sample measured by ICP-OES

| Sample            | Content (mg/g) |                       |                       |                       |
|-------------------|----------------|-----------------------|-----------------------|-----------------------|
|                   | Fe             | Co                    | Ni                    | Cu                    |
| cellulose         | 0.03           | 0.02×10 <sup>-3</sup> | -                     | -                     |
| C <sub>bio</sub>  | 0.11           | 0.13×10 <sup>-3</sup> | 0.01×10 <sup>-3</sup> | 0.05×10 <sup>-3</sup> |
| OC <sub>bio</sub> | 0.07           | 0.08×10 <sup>-3</sup> | -                     | 0.03×10 <sup>-3</sup> |
